# Supplementary material
Source: PubMed Central journal article supplement (PMC4131895)
Supplement: bi500593e_si_001.pdf [file bi500593e_si_001.pdf]

## Supplementary Materials

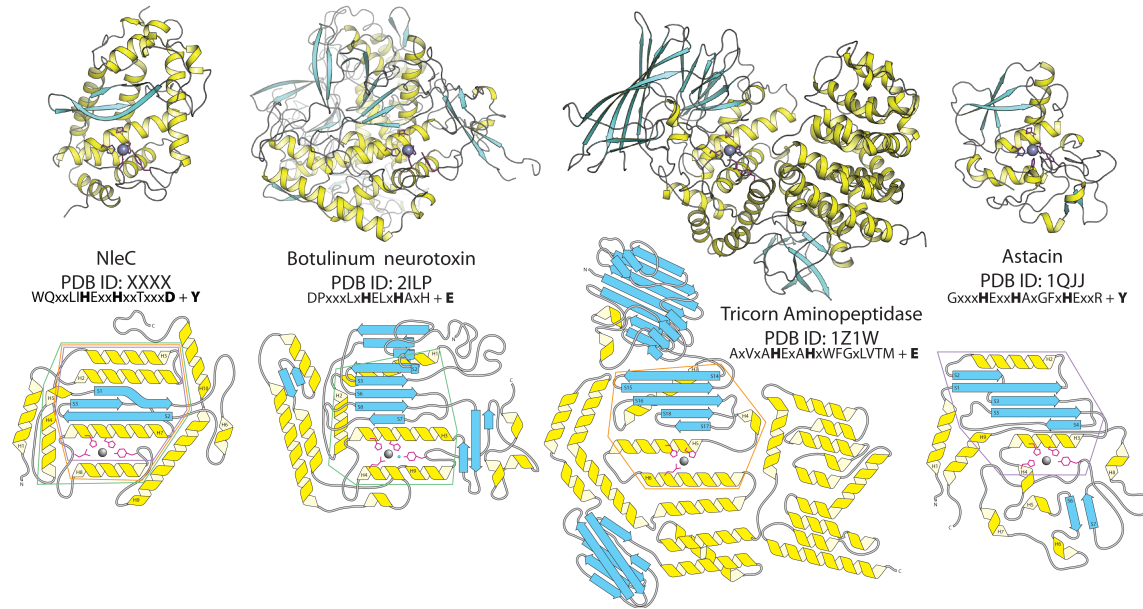

**Supplementary Figure S1.** Structural and topological comparison of NleC with other Zincins. Representations of proteins have  $\alpha$ -helices in yellow,  $\beta$ -strands in blue, and loops in grey. The active site  $Zn^{2+}$  is shown as a grey sphere, while the coordinating residues and active site glutamate are depicted in magenta stick format. The topology diagrams highlight the similarity of the NleC structure to the other Zincins. The similar structures are highlighted in the NleC structure, with green for botulinum neurotoxin, orange for tricorn aminopeptidase, and purple for astacin. The conserved active site motif which contains the coordinating residues in bold is also shown for each Zincin.

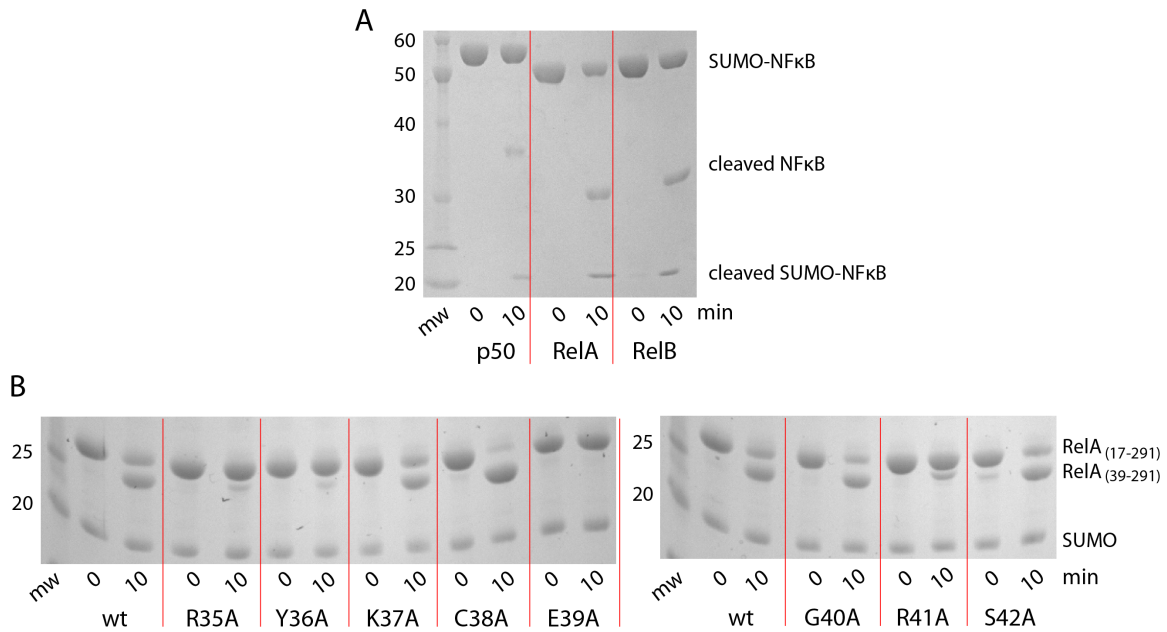

**Supplementary Figure S2.** SDS-PAGE results for NleC cleavage of NF $\kappa$ B subunits. A) Cleavage of NF $\kappa$ B subunits by NleC. 20  $\mu$ M RelA, RelB or p50 was incubated for 10 minutes with 20 nM NleC before quenching the reaction by addition of running buffer and boiling for 2 minutes. This sample was run on an SDS-PAGE with a zero timepoint control, before the addition of NleC. B) Cleavage of alanine mutants of RelA by NleC. 20  $\mu$ M of each RelA alanine mutant was incubated with 20 nM NleC for 10 minutes. Samples were quenched by addition of running buffer and boiling for 2 minutes. Samples are shown before the addition of NleC and after 10-minute incubation. The SUMO tag was cleaved before the activity assay.

**A**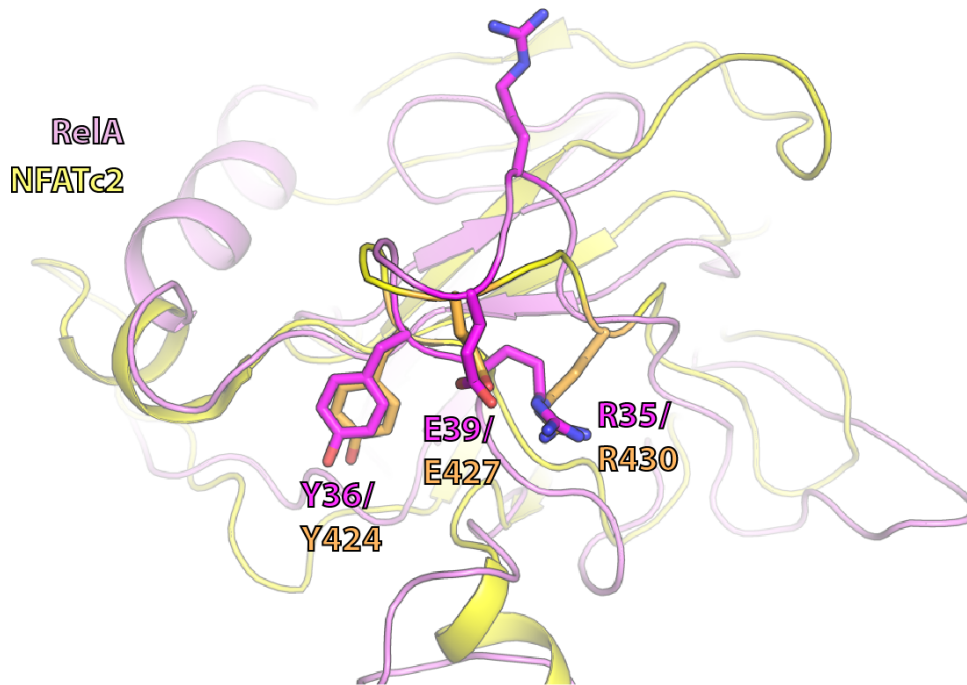**B**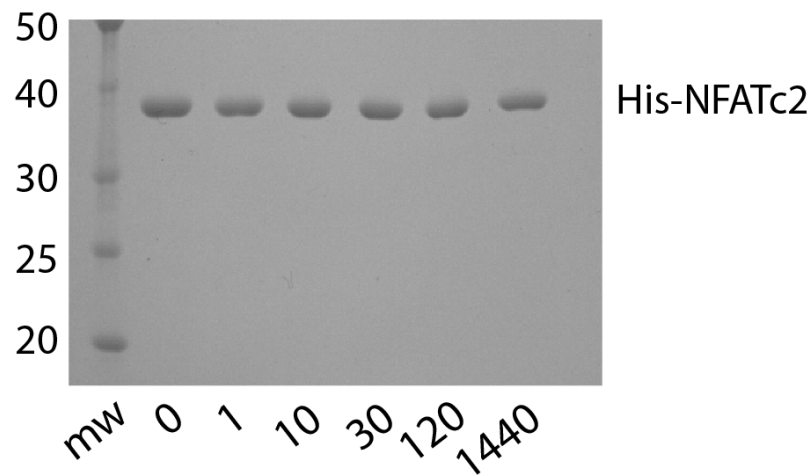

**Supplementary Figure S3.** NFATc2 comparison to RelA. A) Overlay the DNA-binding domains of RelA and NFATc2. NFATc2 is in yellow and RelA in pink. The residues in RelA that were found to be most important for efficient cleavage are shown in stick form. Residues in NFATc2 that overlay with these are also shown. PDB ID: 2AS5, chain N. B) Cleavage assay for NFATc2. 10  $\mu$ M NFATc2 was incubated with 20 nM NleC and timepoints taken over 24 hours. The timepoints were quenched with the addition of running buffer and boiling for 2 minutes. No cleavage is apparent.

A

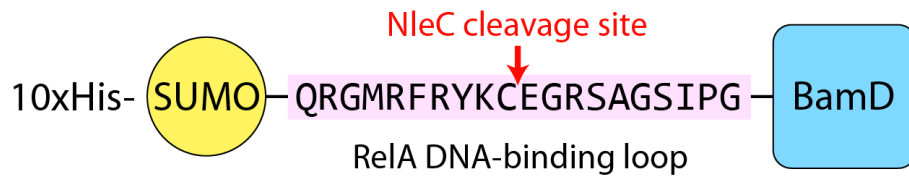

B

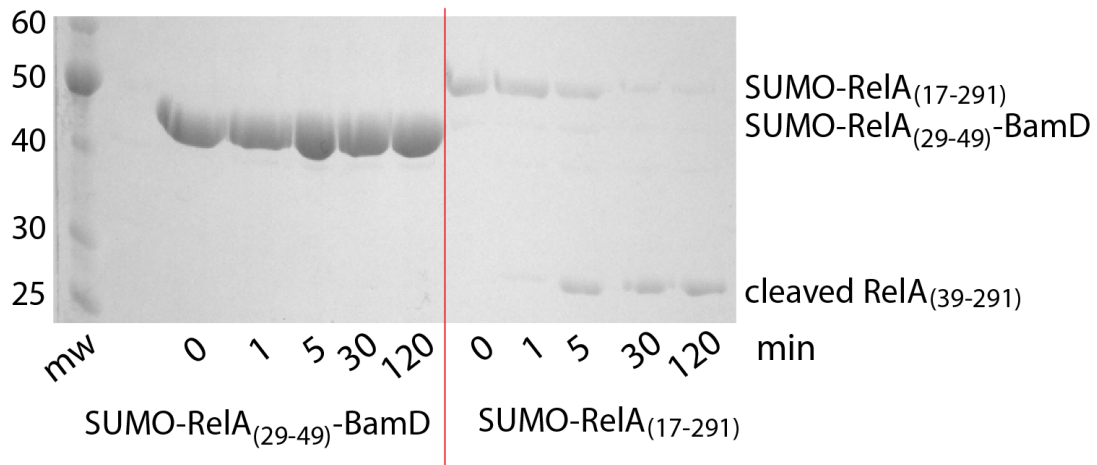

**Supplementary Figure S4.** Fusion protein containing NleC cleavage site in RelA. A) Schematic of 10x-His-SUMO-RelA (residues 29-49)-BamD fusion protein. In between the SUMO and BamD proteins, twenty total residues of RelA are centered around the NleC cleavage site. B) Cleavage assay for RelA fusion protein compared to RelA Rel-homology domain. 20  $\mu$ M of RelA(29-49) fusion protein and 5  $\mu$ M of RelA (17-291) were incubated with 20 nM NleC and timepoints taken. The reactions were quenched by addition of SDS running buffer and boiling for 2 minutes. No cleavage of the RelA (29-49) fusion protein is apparent.

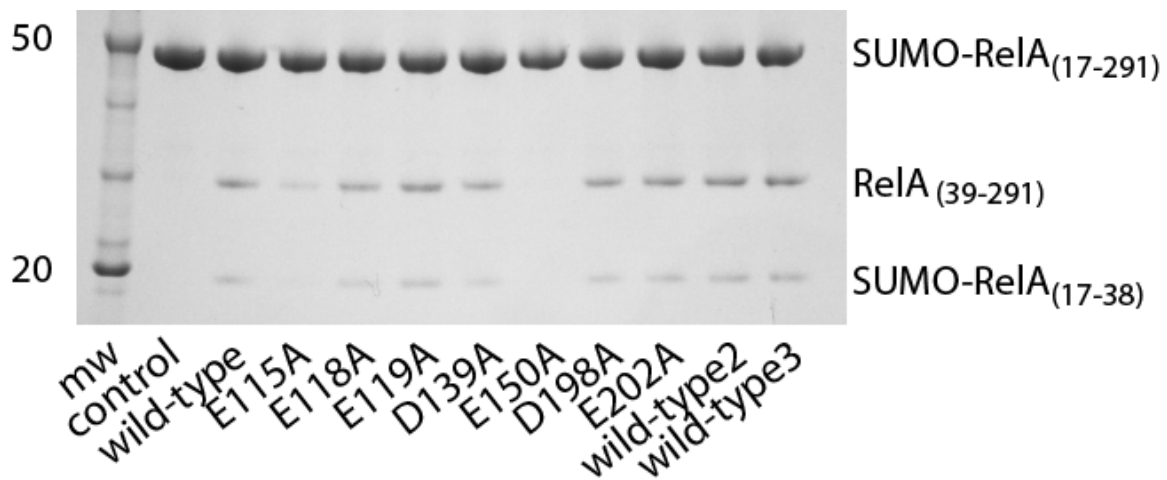

**Supplementary Figure S5.** Representative SDS-PAGE result for NleC mutant cleavage of RelA. Seven NleC mutants were tested for their ability to cleave His-SUMO-RelA (residues 17-291). 20nM NleC was incubated with 20 $\mu$ M RelA for 10 minutes and the reaction quenched by addition of SDS running buffer and boiling for 2 minutes. The control lane contains no NleC.

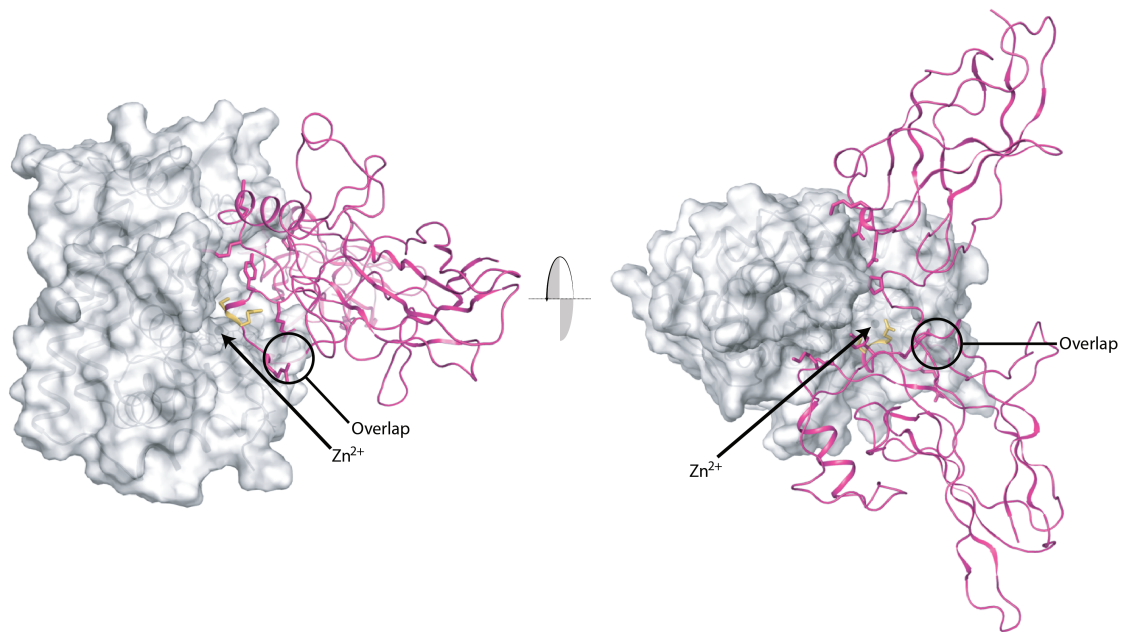

**Supplementary Figure S6.** DNA mimicry-motivated model of NleC and RelA interaction. After the active site cleft of NleC is overlaid with the major groove of DNA and the negative charges aligned, the structure of RelA bound to DNA shows good shape complementarity with NleC and no significant clashes. NleC is shown as a transparent gray surface representation, with RelA in pink. The scissile bond of RelA is depicted in yellow. The active site zinc is depicted as a dark grey sphere. The minor clashes between the two structures are highlighted in a circle, and map to two dynamic loops in NleC and RelA. (Rel A is PDB ID: 2RAM, chain B.)

EHEC/1-330

EHEC/1-330
E. coli/1-328
Citrobacter rodentium/1-330
E. coli O111:H-/1-328
Yersinia aldovae/1-339
E. coli/1-351
S. typhimurium/1-330
E. coli/1-229
Vibrio tasmaniensis/1-518
Vibrio sp./1-518
Vibrio azureus/1-518
Photobacterium damsela/1-512
Vibrio caribbenthicus/1-518
Arsenophonus nasoniae/1-486
Arsenophonus nasoniae/1-515
Arsenophonus nasoniae/1-507
Vibrio nigripulchritudo/1-887
Arsenophonus nasoniae/1-579

EHEC/1-330

EHEC/1-330
E. coli/1-328
Citrobacter rodentium/1-330
E. coli O111:H-/1-328
Yersinia aldovae/1-339
E. coli/1-351
S. typhimurium/1-330
E. coli/1-229
Vibrio tasmaniensis/1-518
Vibrio sp./1-518
Vibrio azureus/1-518
Photobacterium damsela/1-512
Vibrio caribbenthicus/1-518
Arsenophonus nasoniae/1-486
Arsenophonus nasoniae/1-515
Arsenophonus nasoniae/1-507
Vibrio nigripulchritudo/1-887
Arsenophonus nasoniae/1-579

EHEC/1-330

EHEC/1-330
E. coli/1-328
Citrobacter rodentium/1-330
E. coli O111:H-/1-328
Yersinia aldovae/1-339
E. coli/1-351
S. typhimurium/1-330
E. coli/1-229
Vibrio tasmaniensis/1-518
Vibrio sp./1-518
Vibrio azureus/1-518
Photobacterium damsela/1-512
Vibrio caribbenthicus/1-518
Arsenophonus nasoniae/1-486
Arsenophonus nasoniae/1-515
Arsenophonus nasoniae/1-507
Vibrio nigripulchritudo/1-887
Arsenophonus nasoniae/1-579

EHEC/1-330

EHEC/1-330
E. coli/1-328
Citrobacter rodentium/1-330
E. coli O111:H-/1-328
Yersinia aldovae/1-339
E. coli/1-351
S. typhimurium/1-330
E. coli/1-229
Vibrio tasmaniensis/1-518
Vibrio sp./1-518
Vibrio azureus/1-518
Photobacterium damsela/1-512
Vibrio caribbenthicus/1-518
Arsenophonus nasoniae/1-486
Arsenophonus nasoniae/1-515
Arsenophonus nasoniae/1-507
Vibrio nigripulchritudo/1-887
Arsenophonus nasoniae/1-579



EHEC/1-330

EHEC/1-330
E. coli/1-328
Citrobacter rodentium/1-330
E. coli O111:H-/1-328
Yersinia aldovae/1-339
E. coli/1-351
S. typhimurium/1-330
E. coli/1-229
Vibrio tasmaniensis/1-518
Vibrio sp./1-518
Vibrio azureus/1-518
Photobacterium damsela/1-512
Vibrio caribbenthicus/1-518
Arsenophonus nasoniae/1-486
Arsenophonus nasoniae/1-515
Arsenophonus nasoniae/1-507
Vibrio nigripulchritudo/1-887
Arsenophonus nasoniae/1-579

Diagram showing protein domain structure with beta2, TT, eta3, alpha5, TT, beta3, beta4, TT, beta5 domains. Amino acid sequence alignment for various EHEC strains across these domains.

EHEC/1-330

EHEC/1-330
E. coli/1-328
Citrobacter rodentium/1-330
E. coli O111:H-/1-328
Yersinia aldovae/1-339
E. coli/1-351
S. typhimurium/1-330
E. coli/1-229
Vibrio tasmaniensis/1-518
Vibrio sp./1-518
Vibrio azureus/1-518
Photobacterium damsela/1-512
Vibrio caribbenthicus/1-518
Arsenophonus nasoniae/1-486
Arsenophonus nasoniae/1-515
Arsenophonus nasoniae/1-507
Vibrio nigripulchritudo/1-887
Arsenophonus nasoniae/1-579

Diagram showing protein domain structure with TT, alpha6, alpha7 domains. Amino acid sequence alignment for various EHEC strains across these domains.

EHEC/1-330

EHEC/1-330
E. coli/1-328
Citrobacter rodentium/1-330
E. coli O111:H-/1-328
Yersinia aldovae/1-339
E. coli/1-351
S. typhimurium/1-330
E. coli/1-229
Vibrio tasmaniensis/1-518
Vibrio sp./1-518
Vibrio azureus/1-518
Photobacterium damsela/1-512
Vibrio caribbenthicus/1-518
Arsenophonus nasoniae/1-486
Arsenophonus nasoniae/1-515
Arsenophonus nasoniae/1-507
Vibrio nigripulchritudo/1-887
Arsenophonus nasoniae/1-579

Diagram showing protein domain structure with alpha8, eta4, alpha9 domains. Amino acid sequence alignment for various EHEC strains across these domains.

EHEC/1-330

EHEC/1-330
E. coli/1-328
Citrobacter rodentium/1-330
E. coli O111:H-/1-328
Yersinia aldovae/1-339
E. coli/1-351
S. typhimurium/1-330
E. coli/1-229
Vibrio tasmaniensis/1-518
Vibrio sp./1-518
Vibrio azureus/1-518
Photobacterium damsela/1-512
Vibrio caribbenthicus/1-518
Arsenophonus nasoniae/1-486
Arsenophonus nasoniae/1-515
Arsenophonus nasoniae/1-507
Vibrio nigripulchritudo/1-887
Arsenophonus nasoniae/1-579

Diagram showing protein domain structure with TT, eta5 domains. Amino acid sequence alignment for various EHEC strains across these domains.



EHEC/1-330

EHEC/1-330
E. coli/1-328
Citrobacter rodentium/1-330
E. coli O111:H-/1-328
Yersinia aldovae/1-339
E. coli/1-351
S. typhimurium/1-330
E. coli/1-229
Vibrio tasmaniensis/1-518
Vibrio sp./1-518
Vibrio azureus/1-518
Photobacterium damsela/1-512
Vibrio caribbenthicus/1-518
Arsenophonus nasoniae/1-486
Arsenophonus nasoniae/1-515
Arsenophonus nasoniae/1-507
Vibrio nigrripulchritudo/1-887
Arsenophonus nasoniae/1-579

EHEC/1-330

EHEC/1-330
E. coli/1-328
Citrobacter rodentium/1-330
E. coli O111:H-/1-328
Yersinia aldovae/1-339
E. coli/1-351
S. typhimurium/1-330
E. coli/1-229
Vibrio tasmaniensis/1-518
Vibrio sp./1-518
Vibrio azureus/1-518
Photobacterium damsela/1-512
Vibrio caribbenthicus/1-518
Arsenophonus nasoniae/1-486
Arsenophonus nasoniae/1-515
Arsenophonus nasoniae/1-507
Vibrio nigrripulchritudo/1-887
Arsenophonus nasoniae/1-579

EHEC/1-330

EHEC/1-330
E. coli/1-328
Citrobacter rodentium/1-330
E. coli O111:H-/1-328
Yersinia aldovae/1-339
E. coli/1-351
S. typhimurium/1-330
E. coli/1-229
Vibrio tasmaniensis/1-518
Vibrio sp./1-518
Vibrio azureus/1-518
Photobacterium damsela/1-512
Vibrio caribbenthicus/1-518
Arsenophonus nasoniae/1-486
Arsenophonus nasoniae/1-515
Arsenophonus nasoniae/1-507
Vibrio nigrripulchritudo/1-887
Arsenophonus nasoniae/1-579

EHEC/1-330

EHEC/1-330
E. coli/1-328
Citrobacter rodentium/1-330
E. coli O111:H-/1-328
Yersinia aldovae/1-339
E. coli/1-351
S. typhimurium/1-330
E. coli/1-229
Vibrio tasmaniensis/1-518
Vibrio sp./1-518
Vibrio azureus/1-518
Photobacterium damsela/1-512
Vibrio caribbenthicus/1-518
Arsenophonus nasoniae/1-486
Arsenophonus nasoniae/1-515
Arsenophonus nasoniae/1-507
Vibrio nigrripulchritudo/1-887
Arsenophonus nasoniae/1-579

**Supplementary Figure S7.** Alignment of NleC family members. Other NleC proteins were identified by Psi-BLAST and redundant proteins (with over 98% identity) removed for analysis. Residues in the active site of the protein are completely conserved. Some NleC family members contain insertions, but these occur in loops and not in regular secondary structure elements, making it likely that these proteins retain a fold similar to Sakai strain NleC. Some of the NleC family members have additional domains, either at the amino or carboxy terminus.

| Plasmid  | Gene       | Residues | Organism        | Gene Source                               | Tag                    | Background | Primers                                                                                            | Resistance |
|----------|------------|----------|-----------------|-------------------------------------------|------------------------|------------|----------------------------------------------------------------------------------------------------|------------|
| pMS692   | NleC       | 1-330    | EHEC str. Sakai | EHEC str. Sakai DNA                       | C-term Intein-CBD      | pTYB2      | ggaattccatgaaaattccctcattacagtcc<br>tccccgggttgctgattgtgtttgtccac                                  | Amp        |
| pMS846   | NleC       | 19-330   | EHEC str. Sakai | EHEC str. Sakai DNA                       | C-term Intein-CBD      | pTYB2      | ggaattccatgattctgtctccattgctc<br>tccccgggttgctgattgtgtttgtccac                                     | Amp        |
| pMS1120* | NleC E115A | 1-330    | EHEC str. Sakai | pMS692                                    | C-term Intein-CBD      | pTYB2      | CAGAAACGAATACGCGCTTAACGAAGAATCTTC<br>GAAGATTCTCGTTAAGCGGTATTGTTTCTCG                               | Amp        |
| pMS1121* | NleC E118A | 1-330    | EHEC str. Sakai | pMS692                                    | C-term Intein-CBD      | pTYB2      | CGAATACGAGCTTAACGCGAATCTTCTGTC<br>GACAGAAGATTCTGCGTTAAGCTCGTATTCTG                                 | Amp        |
| pMS1122* | NleC E119A | 1-330    | EHEC str. Sakai | pMS692                                    | C-term Intein-CBD      | pTYB2      | CGAATACGAGCTTAACGAAGCATCTTCTGTCAAATTGATG<br>CATCAATTTTGACAGAAGATGCTTTCGTTAAGCTCGTATTCTG            | Amp        |
| pMS1123* | NleC D139A | 1-330    | EHEC str. Sakai | pMS692                                    | C-term Intein-CBD      | pTYB2      | CGAATTATGAAATATGCTGTGCGGCAAGAGC<br>GCTCTTGCCCGACAGCATATTCATATAATTCTG                               | Amp        |
| pMS1124* | NleC E150A | 1-330    | EHEC str. Sakai | pMS692                                    | C-term Intein-CBD      | pTYB2      | GCCAAATTTCCCATTTGTGACAGCAGGAGAAAACG<br>CGTTTTCTCCTGCTGCAAAATGGGAAAATTGGC                           | Amp        |
| pMS1125* | NleC D198A | 1-330    | EHEC str. Sakai | pMS692                                    | C-term Intein-CBD      | pTYB2      | GCGATCCATCTGGAGCTAGTAATATAGAGTTAGG<br>CCTAACTCTATATTACTAGCTCCAGATGGATCGC                           | Amp        |
| pMS1134* | NleC E202A | 1-330    | EHEC str. Sakai | pMS692                                    | C-term Intein-CBD      | pTYB2      | GGAGATAGTAATATAGCGTTAGGACCCACCG<br>CGGTGGGTCTAAAGCTATATTACTATCTCC                                  | Amp        |
| pMS1013* | RelA       | 17-291   | Human           | J Goodrich, Univ of CO                    | 10x-His-SUMO           | pET24d     | GGATCTGGCCCTATGTGGAGATC<br>CGGCTCAACTGGCAGGTAAGGAAATTC<br>GTACCGGCTCAACTGGCAGGTAAGGAAATTC          | Kan        |
| pMS845   | RelA       | 1-210    | Human           | J Goodrich, Univ of CO                    | 6x-His                 | pET24d     | ATcatgCCATGGacgaactgttccccct<br>CATCATgtcgcTAAatccccaccgaggcag                                     | Kan        |
| pMS1020* | RelA       | 29-49    | Human           | J Goodrich, Univ of CO                    | 10x-His-SUMO-RelA-BamD | pET24d     | GGATCACCATGGCAGCGGTATGCGCTTCCGC<br>CTTATGTATTGCTGCTGTTTGGCGGATG<br>AGCTCTTATGATTGCTGCTGTTTGGCGGATG | Kan        |
| pMS1032  | RelA R35A  | 17-291   | Human           | pMS1013                                   | 10x-His-SUMO           | pET24d     | CATGCGCTTgCgCTACAAGTGCAGGGGCGCT<br>GCATTGTAGgCgGAAGCGCATGCCCGCTGCT                                 | Kan        |
| pMS1033  | RelA Y36A  | 17-291   | Human           | pMS1013                                   | 10x-His-SUMO           | pET24d     | GCGCTTCCGcGcCAAGTGCAGGGGCGCTCCG<br>CTCGCACTTgCgCGGAAGCGCATGCCCGCT                                  | Kan        |
| pMS1034  | RelA K37A  | 17-291   | Human           | pMS1013                                   | 10x-His-SUMO           | pET24d     | CTTCCGCTAcgGTGCGAGGGGCGCTCCGCGG<br>CCCTCGCACgCgTAGCGGAAGCGCATGCCCC                                 | Kan        |
| pMS1035  | RelA C38A  | 17-291   | Human           | pMS1013                                   | 10x-His-SUMO           | pET24d     | CCGCTACAAGgCgCGAGGGGCGCTCCGCGGCA<br>GCGCCCTCGgCCTGTAGCGGAAGCGCATGC                                 | Kan        |
| pMS1036  | RelA E39A  | 17-291   | Human           | pMS1013                                   | 10x-His-SUMO           | pET24d     | TACAAGTGCgCGGGGCGCTCCGCGGCGAGCAT<br>CGGAGCGCCCGcGCGCACTTGTAGCGGAAGCGC                              | Kan        |
| pMS1037  | RelA G40A  | 17-291   | Human           | pMS1013                                   | 10x-His-SUMO           | pET24d     | AAGTGCgAGGcGCGCTCCGCGGCGAGCATCC<br>CGCGGAGCGcGcCTCGCACTTGTAGCGGAAG                                 | Kan        |
| pMS1038  | RelA R41A  | 17-291   | Human           | pMS1013                                   | 10x-His-SUMO           | pET24d     | GTGCGAGGGGgCCTCCGCGGCGAGCATCCAG<br>GCCCGCGAGgCgCCCCTCGCACTTGTAGCGGA                                | Kan        |
| pMS1039  | RelA S42A  | 17-291   | Human           | pMS1013                                   | 10x-His-SUMO           | pET24d     | CGAGGGCGcGCGCGGCGAGCATCCAGCGC<br>CTGCCCGCGcGCGCCCTCGCACTTGTAGC                                     | Kan        |
| pMS1114  | RelB       | 124-413  | Human           | Functional Genomics Facility - Univ of CO | 10x-His-SUMO           | pET24d     | ggagcgCAGCCGACCTGGTCATC<br>gtacctcaCGTTTCCGCTTCTTGTC<br>ctcaCGTTTCCGCTTCTTGTC                      | Kan        |
| pMS1115  | p50        | 39-363   | Human           | J Goodrich, Univ of CO                    | 10x-His-SUMO           | pET24d     | ggagcgACAGCTGGGCCATACCTTC<br>gtacctcaACGTTTCTCTGCaCTTCTTC<br>ctcaACGTTTCTCTGCaCTTCTTC              | Kan        |

Supplementary table ST1.
